# Supplementary material for: Soft solution in situ synthesis of chitosan/iron oxide nanocomposites and their magnetic properties
Source: Royal Society of Chemistry journal article supplement (doi:10.1039/d1sm00381j), 2021-01-01

Figure S1 TEM images of CS0.3/IO-HT75 and CS0.3/IO-HT100 nanocomposites

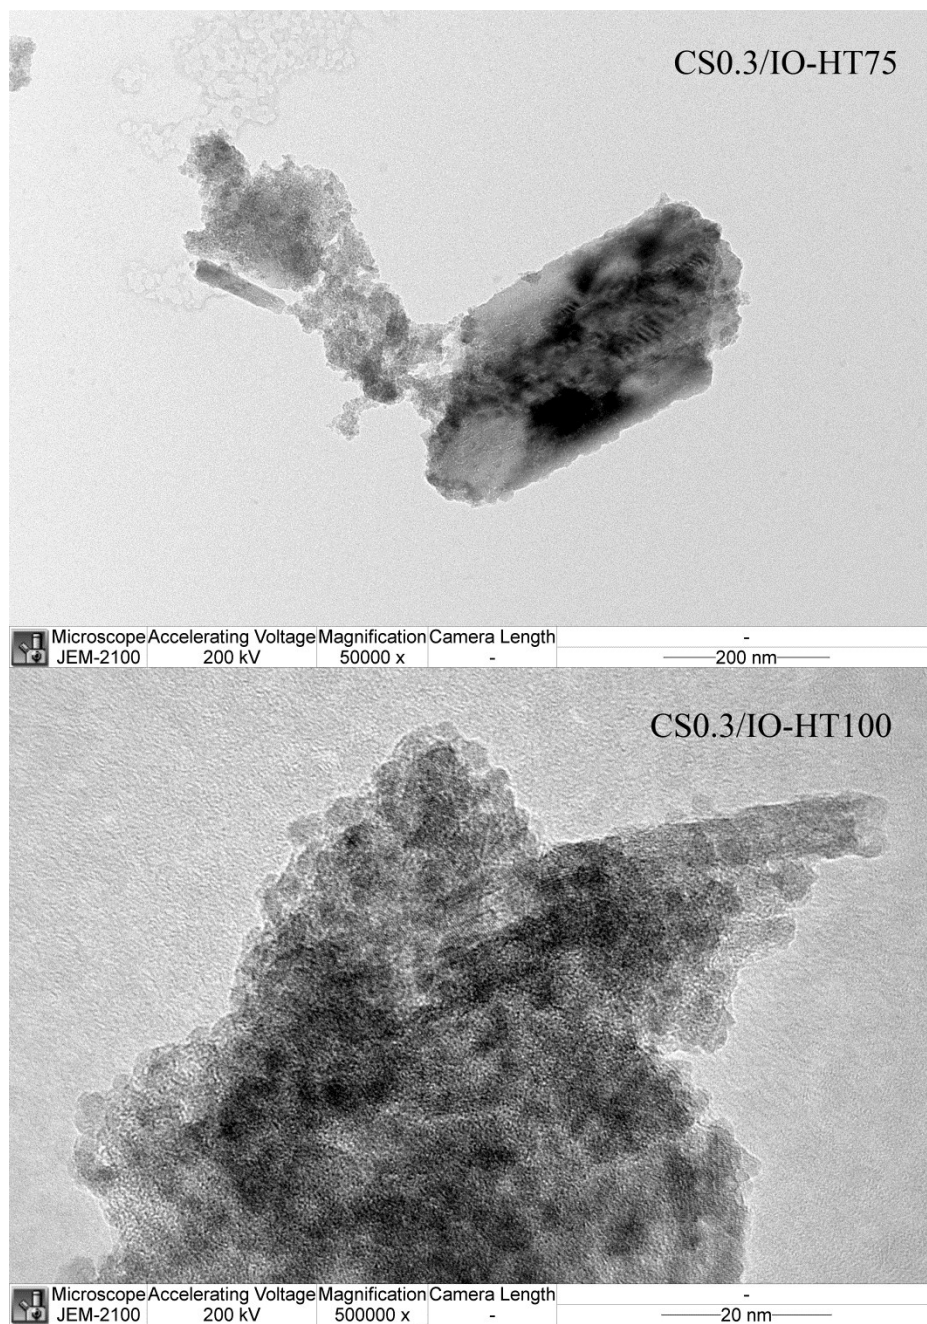

Figure S2 TGA thermograms of (a) CS0.3/IO-HT75, (b) CS0.3/IO-HT100, (c) CS0.3/IO-HT125 and (d) CS0.3/IO-R nanocomposites under N<sub>2</sub> and O<sub>2</sub> atmospheres

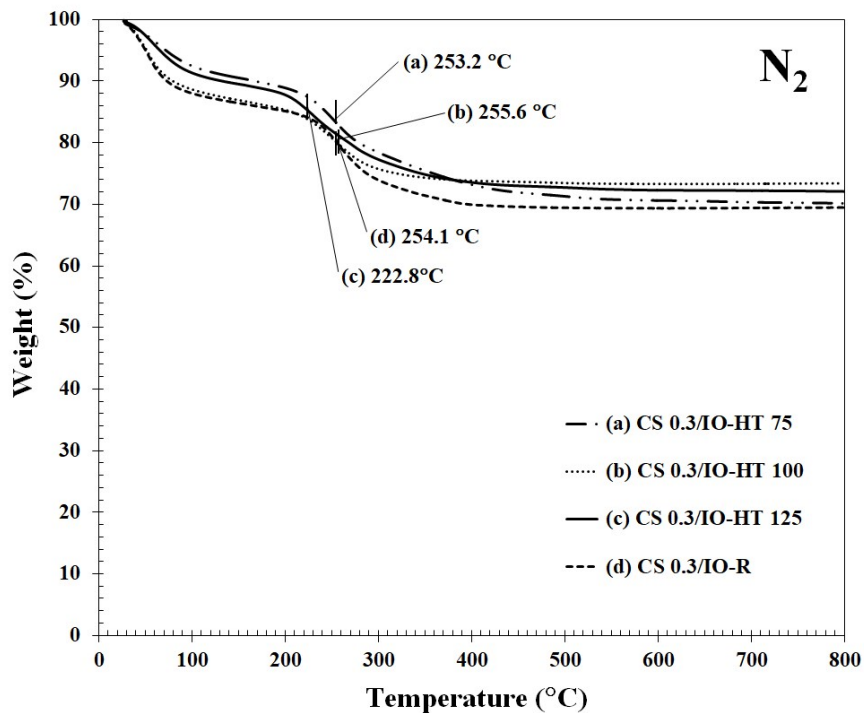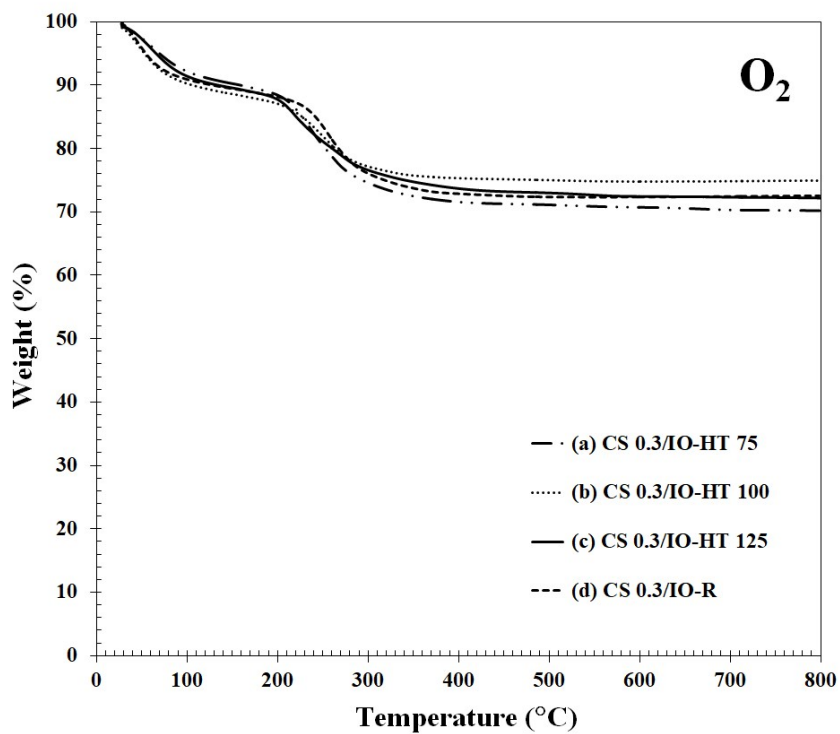

Figure S3 DSC thermogram of CC0.3-HT100 sample

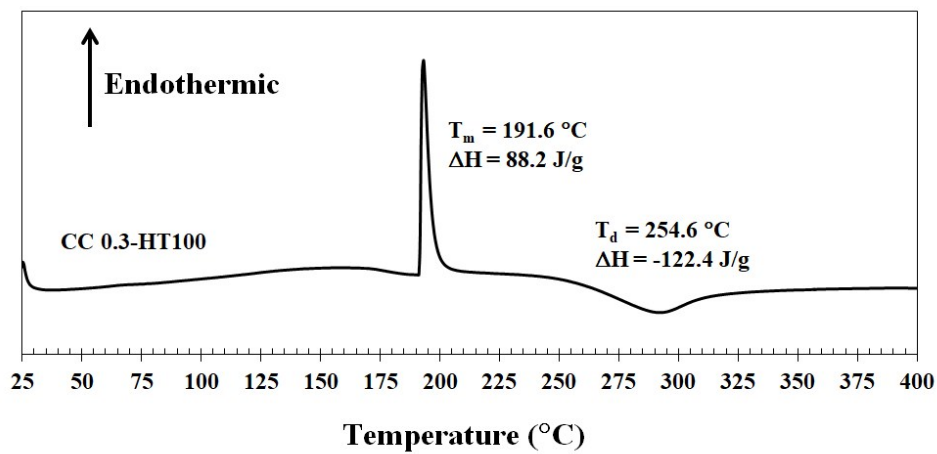

Figure S4 DSC thermograms of (a) CS0.3/IO-HT75, (b) CS0.3/IO-HT100, (c) CS0.3/IO-HT125 and (d) CS0.3/IO-R nanocomposites

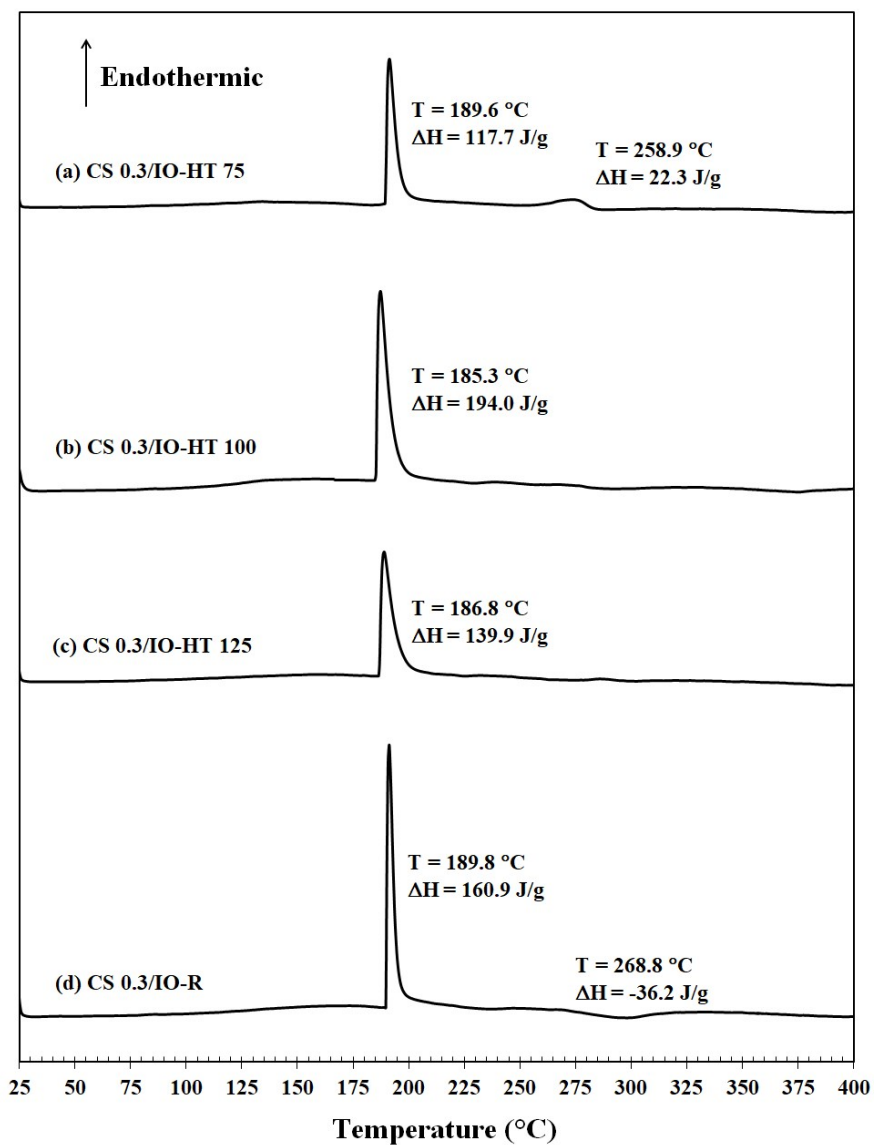

Figure S5 Electron diffraction of CS0.6/IO-HT100 nanocomposite

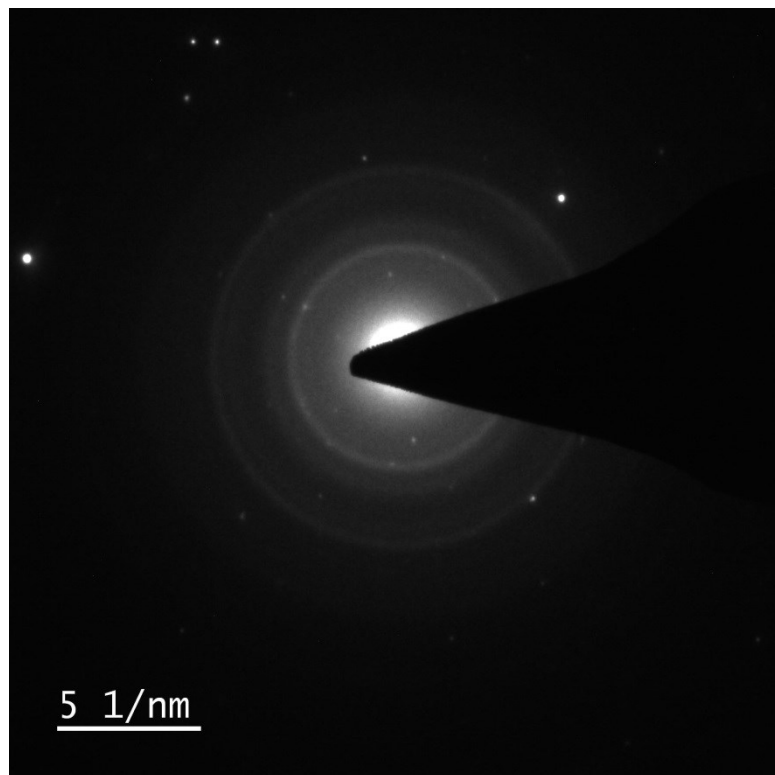

Figure S6 TGA thermograms of (a) CS0.2/IO-HT100, (b) CS0.3/IO-HT100, (c) CS0.4/IO-HT100, (d) CS0.5/IO-HT100 and (e) CS0.6/IO-HT100 nanocomposites under N<sub>2</sub> and O<sub>2</sub> atmospheres

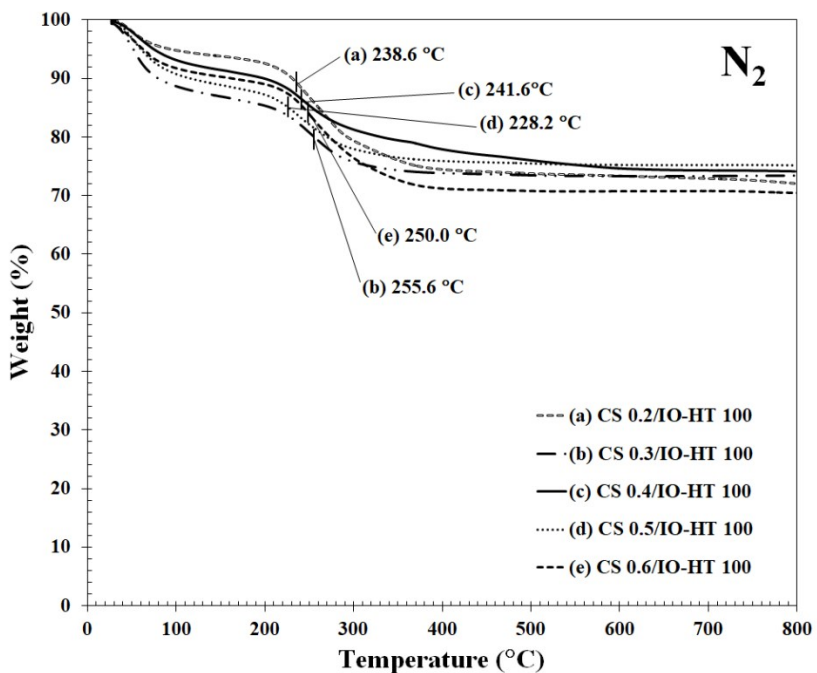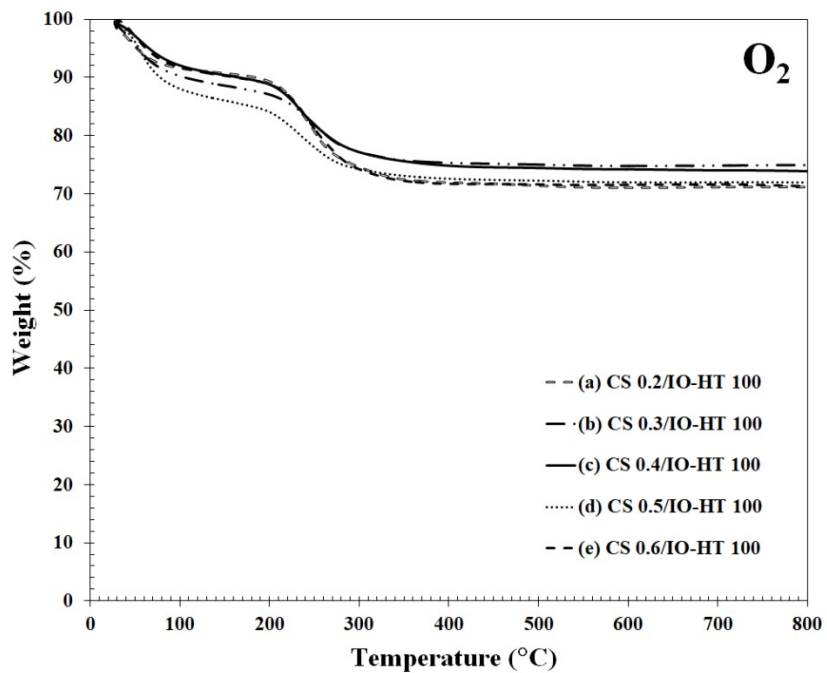

Figure S7 DSC thermograms of (a) CS0.2/IO-HT100, (b) CS0.3/IO-HT100, (c) CS0.4/IO-HT100, (d) CS0.5/IO-HT100 and (e) CS0.6/IO-HT100 nanocomposites

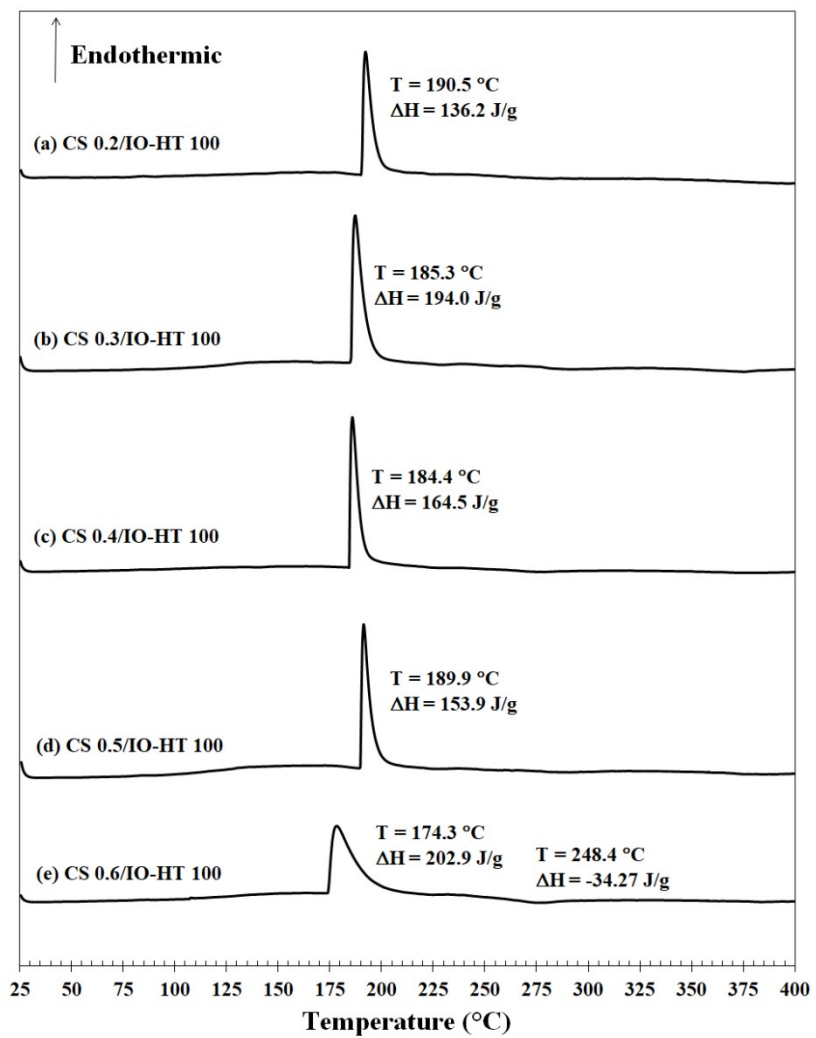

Supplement: d1sm00381j1.pdf [file d1sm00381j1.pdf]
